# Supplementary material
Source: PubMed Central journal article supplement (PMC11492851)

# Extended Data 5

**a**

| Gene    | Location | NCBI code | Gene type                         | Homology to GGT1 (amino acid level) | Enzymatic activity                             | Ref |
|---------|----------|-----------|-----------------------------------|-------------------------------------|------------------------------------------------|-----|
| GGT1    | 22q11.23 | 2678      | Protein coding (full length)      | -                                   | Active (experimentally confirmed)              | 1,2 |
| GGT5    | 22q11.23 | 2687      | Protein coding (full length)      | High                                | Active (experimentally confirmed)              | 1,2 |
| GGT6    | 17p13.2  | 124975    | Protein coding (full length)      | Limited                             | Not characterized, enzymatic activity possible | 2   |
| GGT7    | 20q11.22 | 2686      | Protein coding (full length)      | High                                | Not characterized, enzymatic activity possible | 2   |
| GGTLC1  | 20p11.21 | 92086     | Protein coding (light chain only) |                                     | Not characterized, enzymatic activity possible | 2   |
| GGTLC2  | 22q11.22 | 91227     | Protein coding (light chain only) |                                     | Not characterized, enzymatic activity possible | 2   |
| GGTLC3  | 22q11.21 | 728226    | Protein coding (light chain only) |                                     | Not characterized, enzymatic activity possible | 2   |
| GGT2P   | 22q11.21 | 728441    | Pseudogene                        |                                     | Inactive (experimentally confirmed)            | 2,3 |
| GGT3P   | 22q11.21 | 2679      | Pseudogene                        |                                     | Inactive (predicted)                           | 2   |
| GGT4P   | 13q11    | 643171    | Pseudogene                        |                                     | Inactive (predicted)                           | 2   |
| GGT8P   | 2p11.2   | 645367    | Pseudogene                        |                                     | Inactive (predicted)                           | 2   |
| GGTLC4P | 22q11.23 | 729838    | Pseudogene                        |                                     | Inactive (predicted)                           | 2   |
| GGTLC5P | 22q11.21 | 653590    | Pseudogene                        |                                     | Inactive (predicted)                           | 2   |

References (doi): 1 (10.1016/j.ab.2011.03.026), 2 (10.1007/s00439-008-0487-7), 3(10.1089/ars.2012.4997)

**b**

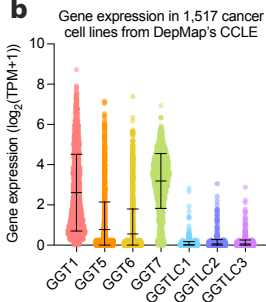

**c**

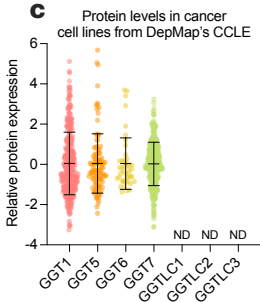

**d**

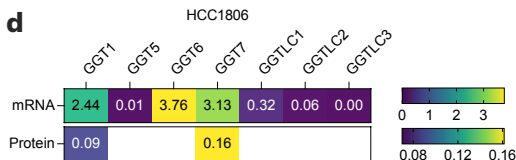

**e**

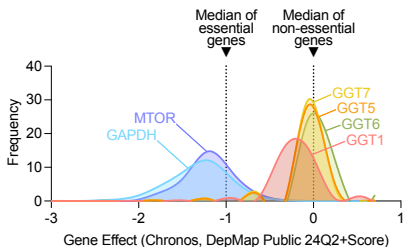

Supplement: media-5.pdf [file media-5.pdf]
