# Supplementary material
Source: PubMed Central journal article supplement (PMC11492851)

# Extended Data 1

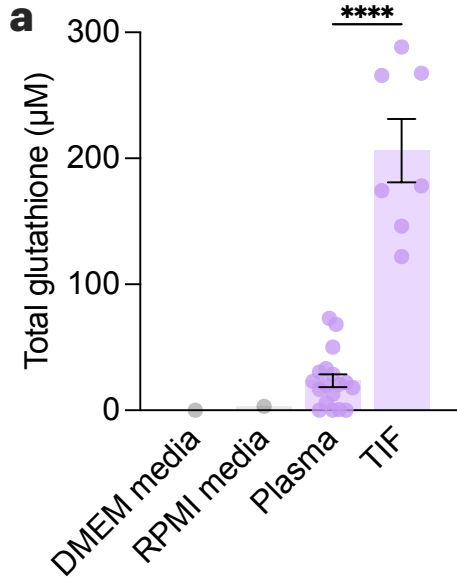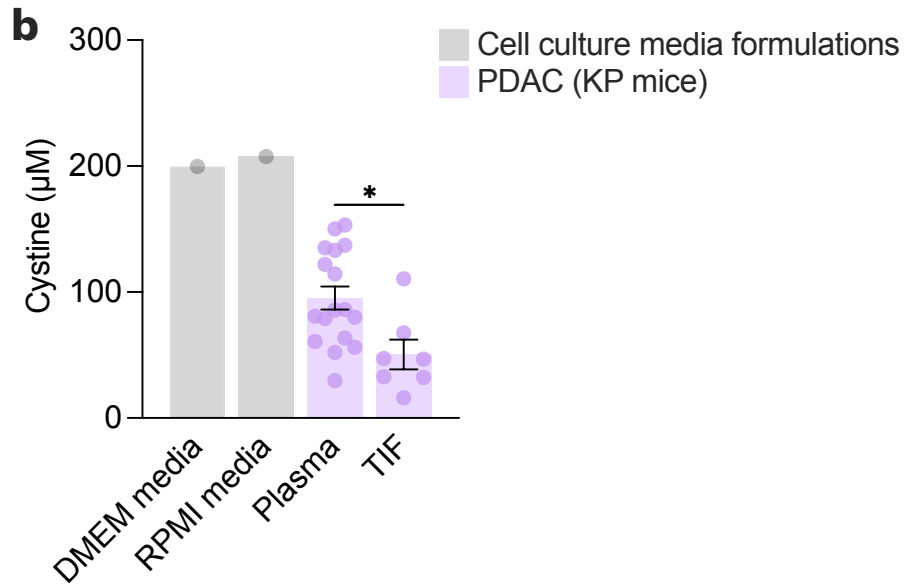

Supplement: media-1.pdf [file media-1.pdf]
