# Supplementary material
Source: PubMed Central journal article supplement (PMC11492851)

# Extended Data 2

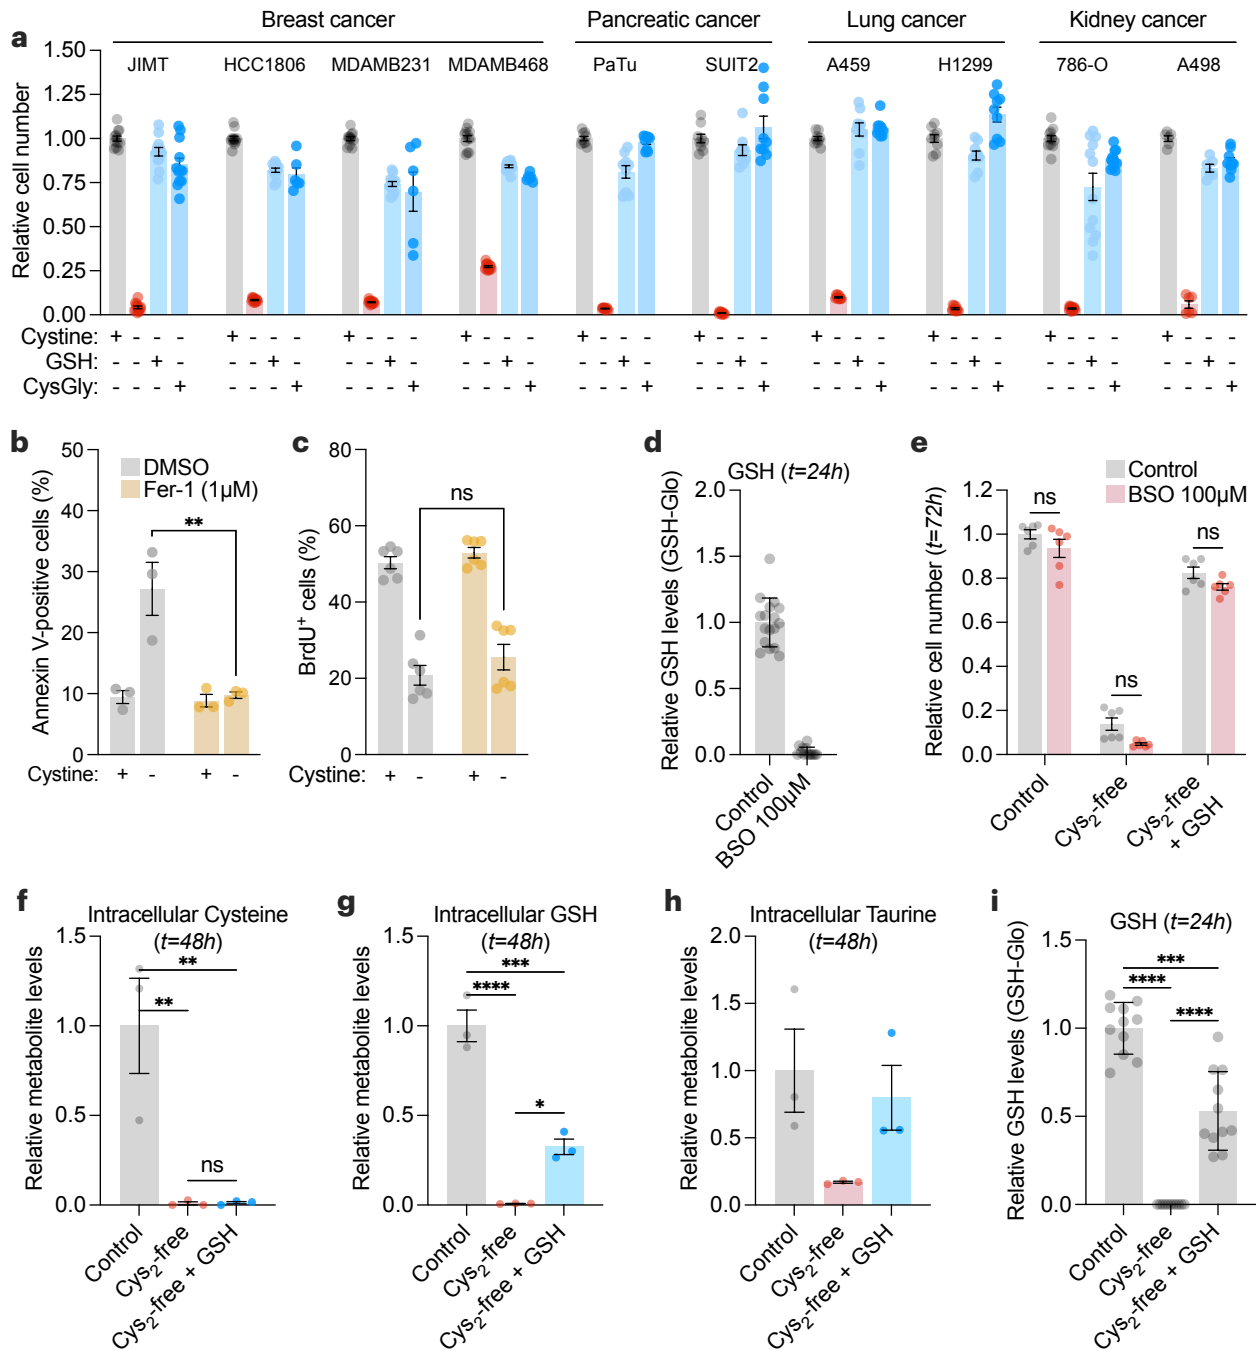

Supplement: media-2.pdf [file media-2.pdf]
