# Supplementary material
Source: PubMed Central journal article supplement (PMC11492851)

# Extended Data 3

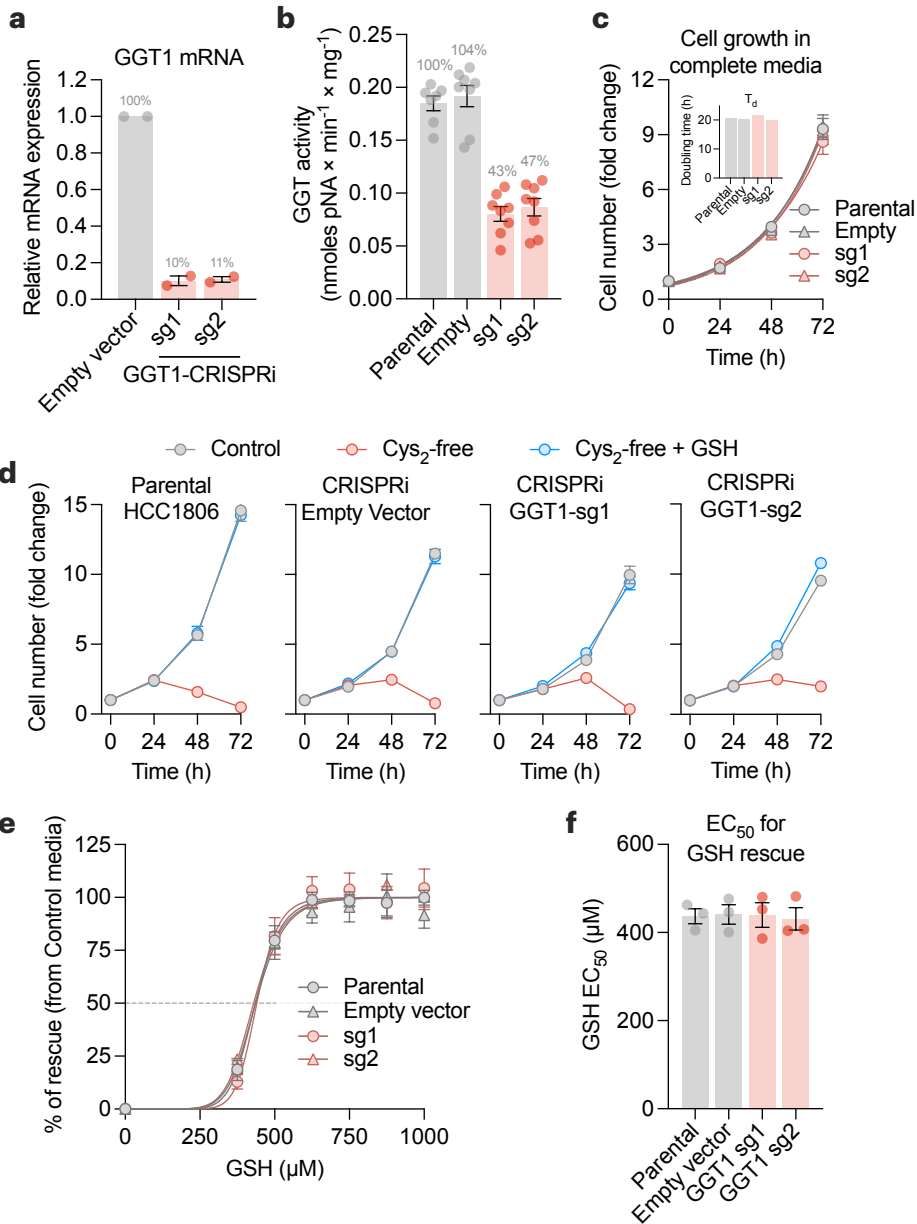

Supplement: media-3.pdf [file media-3.pdf]
