# Supplementary material
Source: PubMed Central journal article supplement (PMC11492851)

## Extended Data 4

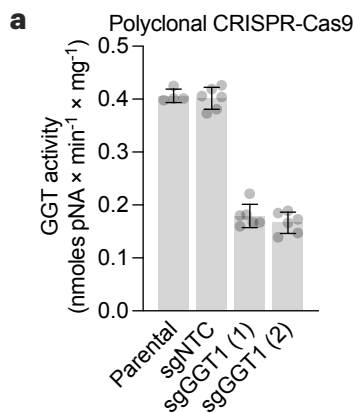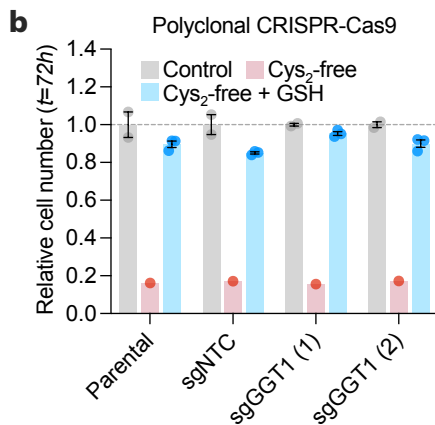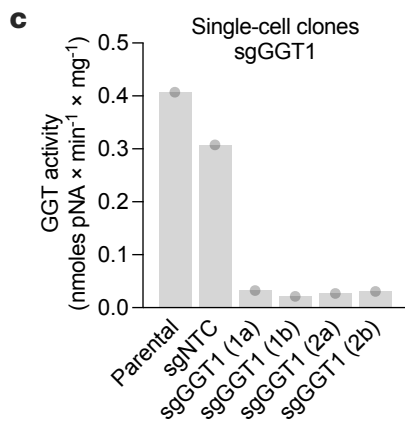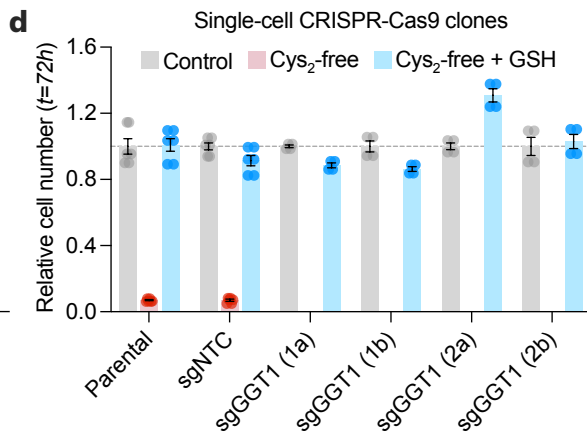

Supplement: media-4.pdf [file media-4.pdf]
