# Supplementary material
Source: PubMed Central journal article supplement (PMC11492851)

## Extended Data 6

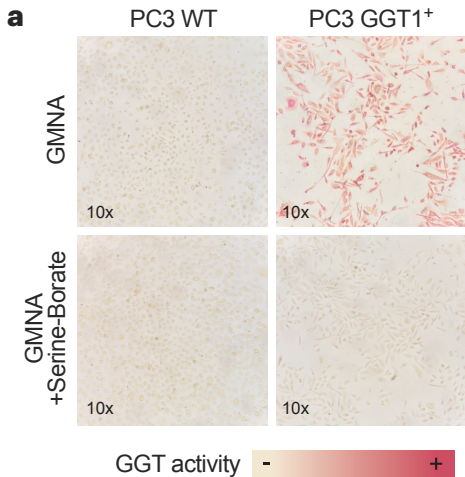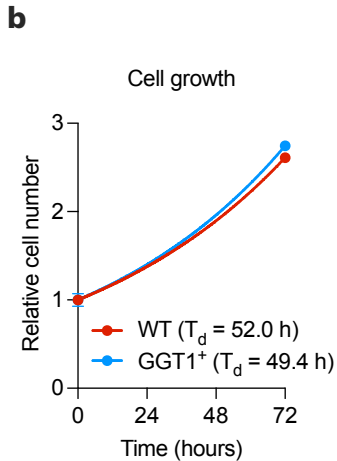

Supplement: media-6.pdf [file media-6.pdf]
