# Supplementary material
Source: PubMed Central journal article supplement (PMC11492851)

# Extended Data 7

**a** OU749 (CAS: 519170-13-9)

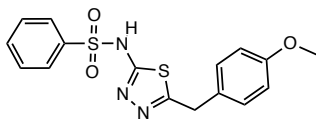

Acivicin (CAS: 42228-92-2)

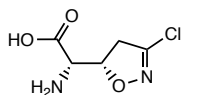

GGsTop (CAS: 926281-37-0)

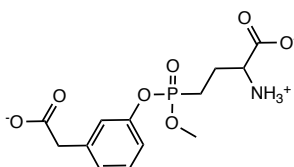

**b** GGT activity in mouse tissues

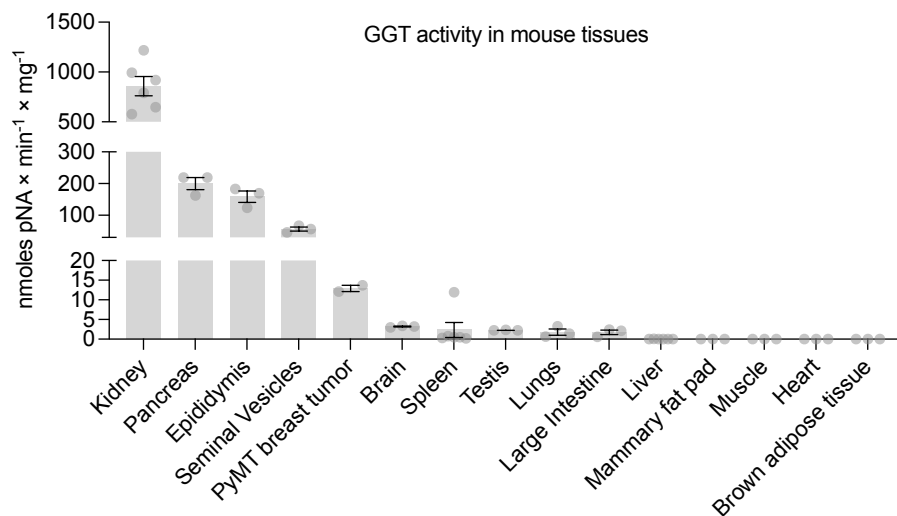

**c** GGT mRNA in mouse tissues (Mouse ENCODE transcriptome data)

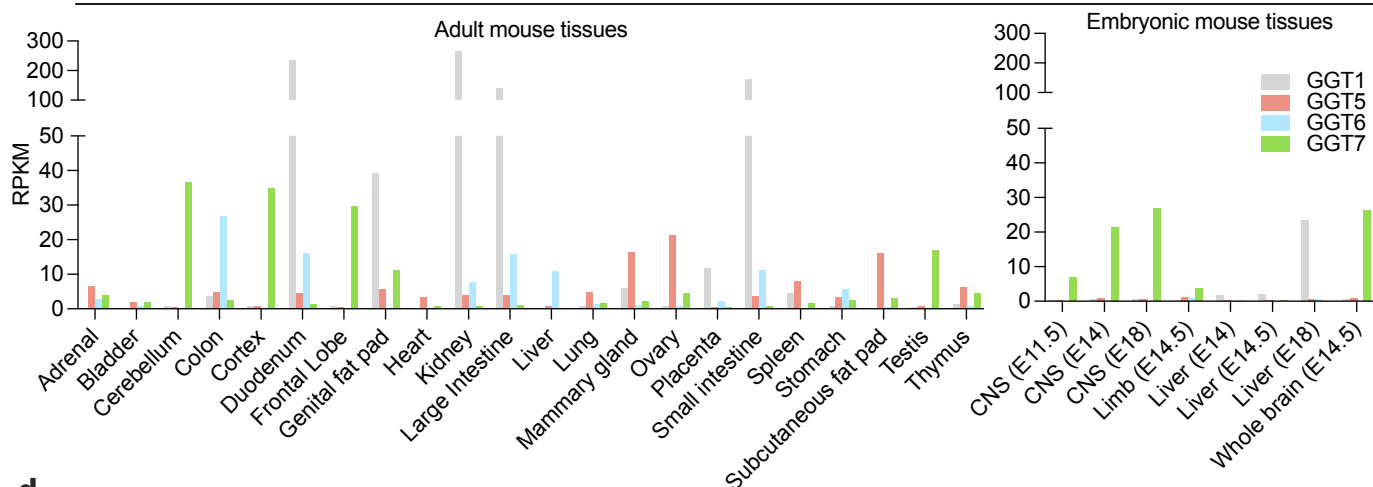

**d** GGT mRNA in human tissues (HPA RNA-seq normal tissues)

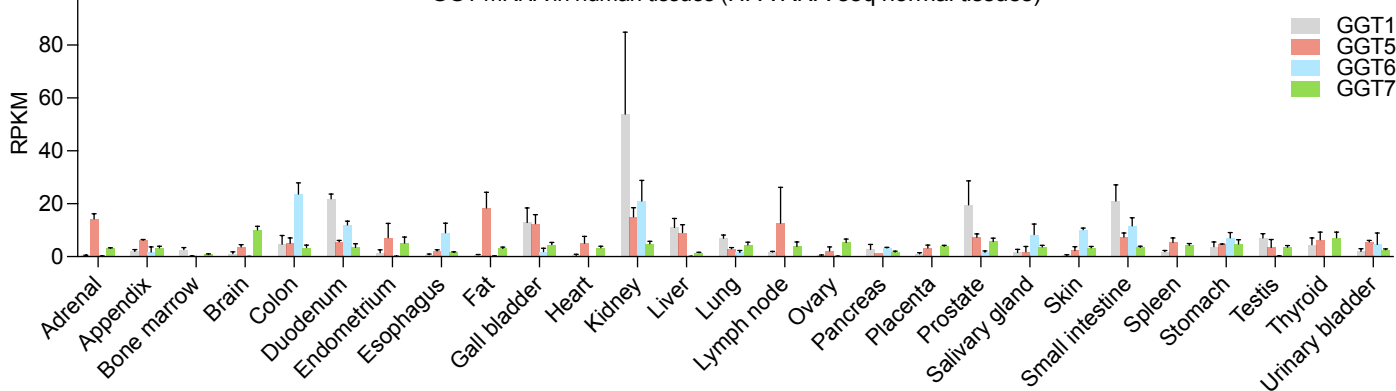

**e** Liver Toxicity

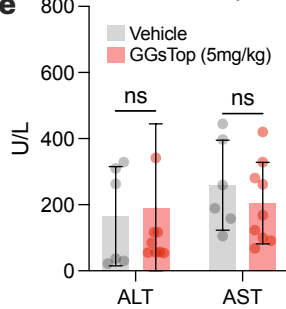

**f**

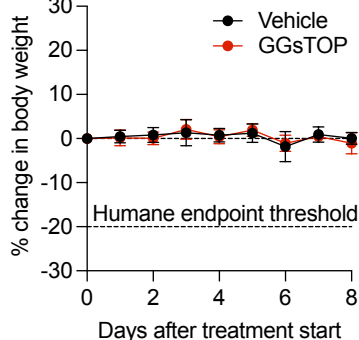

Supplement: media-7.pdf [file media-7.pdf]
